# Supplementary material
Source: PubMed Central journal article supplement (PMC2975202)
Supplement: supp_M110.155663_jbc.M110.155663-1.pdf [file supp_M110.155663_jbc.M110.155663-1.pdf]

# Bowman et al., Supplemental Figure 1

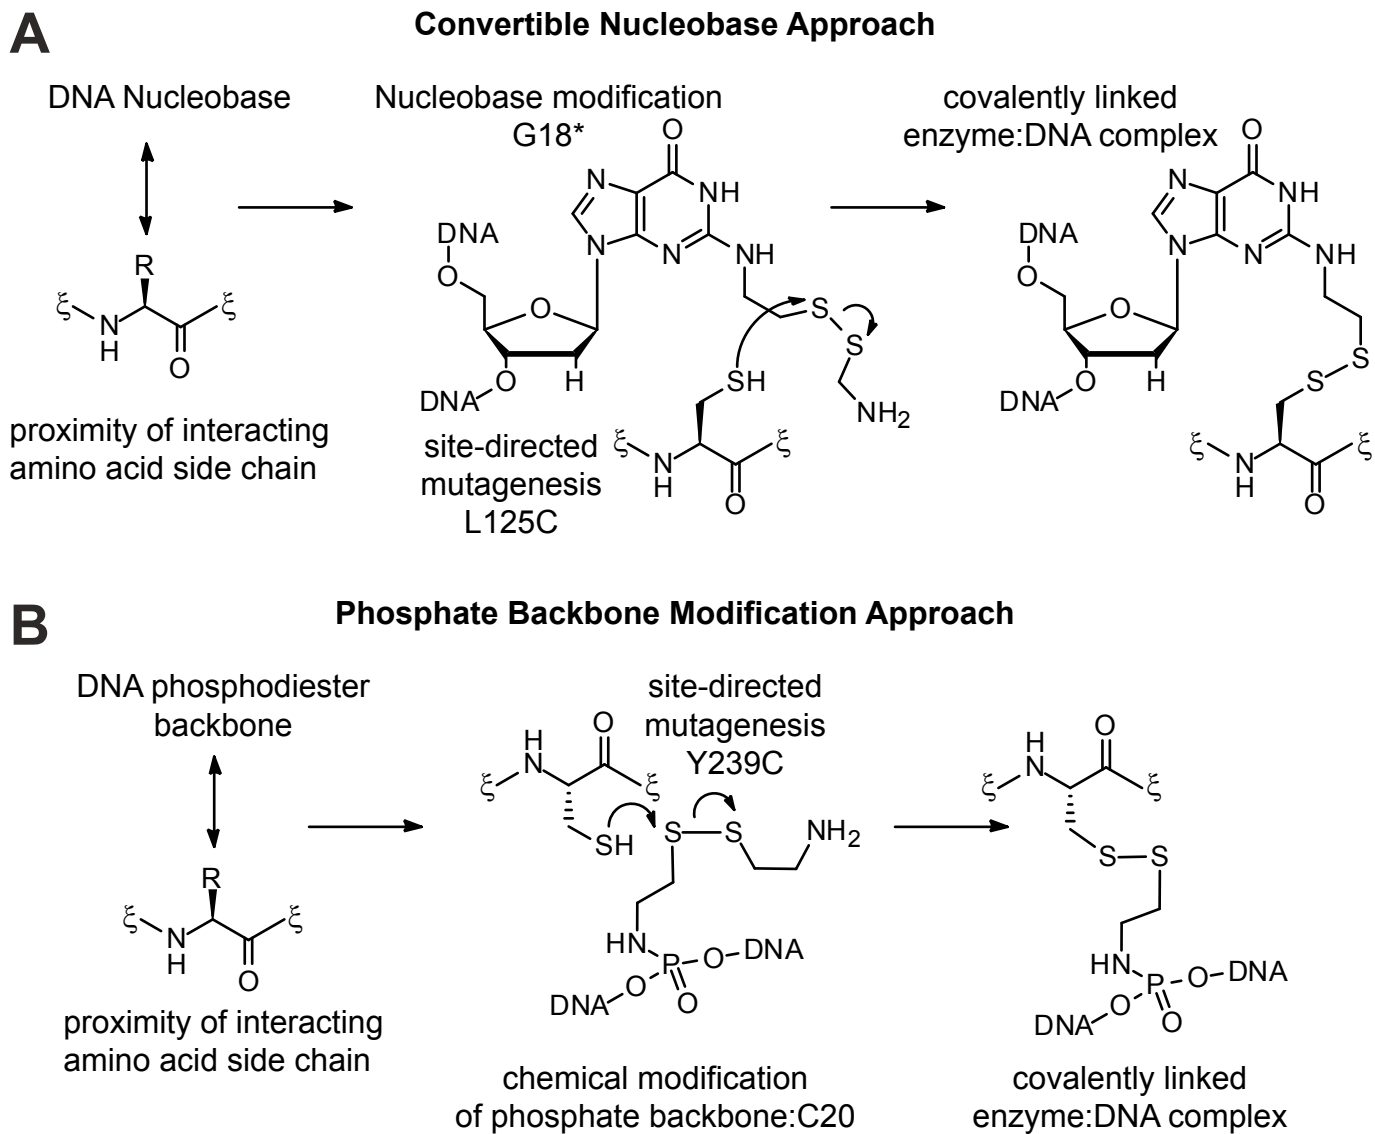

Supplemental Figure 1. Disulfide crosslinking strategy for *A*, base and *B*, backbone modifications.
