# Supplementary material
Source: PubMed Central journal article supplement (PMC2975202)
Supplement: supp_M110.155663_jbc.M110.155663-2.pdf [file supp_M110.155663_jbc.M110.155663-2.pdf]

## Bowman et al., Supplemental Figure 2

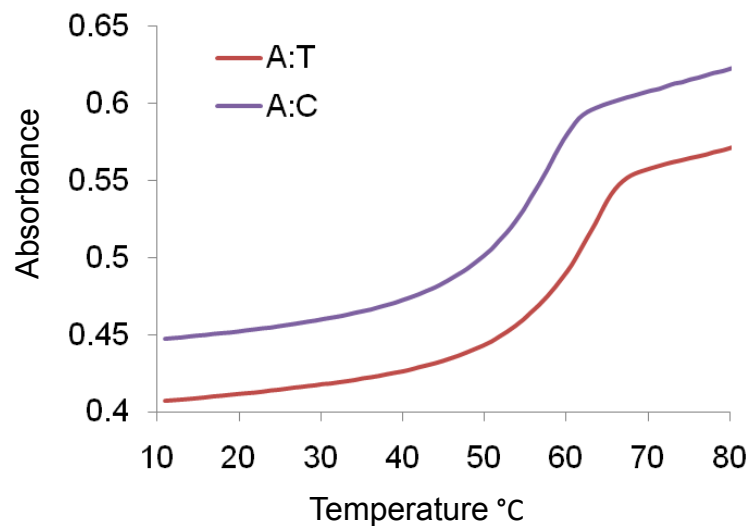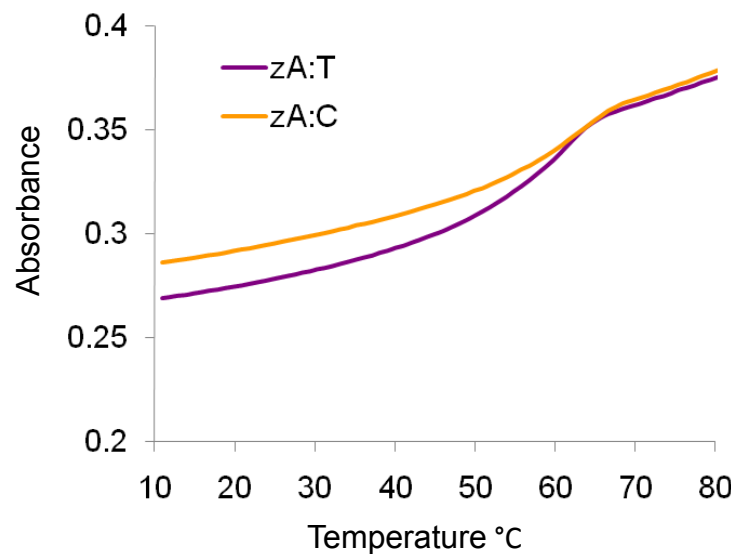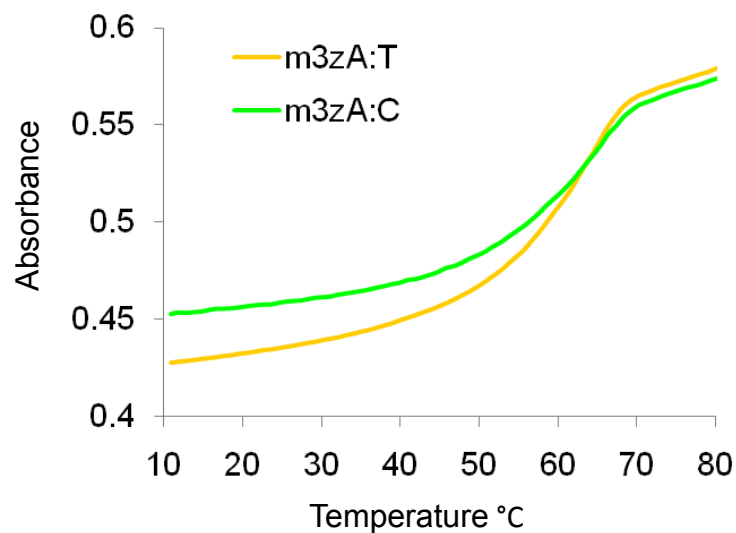

| Base Pair | T <sub>m</sub> * (°C) |
|-----------|-----------------------|
| A:T       | 64.0                  |
| A:C       | 57.8                  |
| m3zA:T    | 64.3                  |
| m3zA:C    | 64.6                  |
| zA:T      | 61.7                  |
| zA:C      | 63.4                  |

\*Average of four independent experiments

Supplemental Figure 2. Melting temperature experiments on normal, zA, and m3zA lesion containing DNA at pH 8.5. The zA and m3zA lesions exhibit similar melting temperature characteristics when paired opposite a thymine or cytosine. The graphs are representative of a typical experiment and the calculated T<sub>m</sub> values in the table are the average of four independent experiments.
